# Supplementary material for: A versatile and cost-effective reduced graphene oxide-crosslinked polyurethane sponge for highly effective wastewater treatment
Source: Royal Society of Chemistry journal article supplement (doi:10.1039/c6ra05450a), 2016-01-01
Supplement: c6ra05450a4.pdf [file c6ra05450a4.pdf]

## Supplementary Data

# A Versatile and Cost-Effective Reduced Graphene Oxide Crosslinked Polyurethane Sponge for Highly Effective Wastewater Treatment

Haiguang Zhu, Dongyun Chen,\* Shun Yang, Najun Li, Qingfeng Xu, Hua Li, Jinghui He, Jianmei Lu\*

College of Chemistry, Chemical Engineering and Materials Science, Collaborative Innovation Center of Suzhou Nano Science and Technology, Soochow University, Suzhou, 215123 China

---

\* Corresponding author.

Tel: +86 (0)512-6588 0367. E-mail address: [lujm@suda.edu.cn](mailto:lujm@suda.edu.cn) (J. Lu).

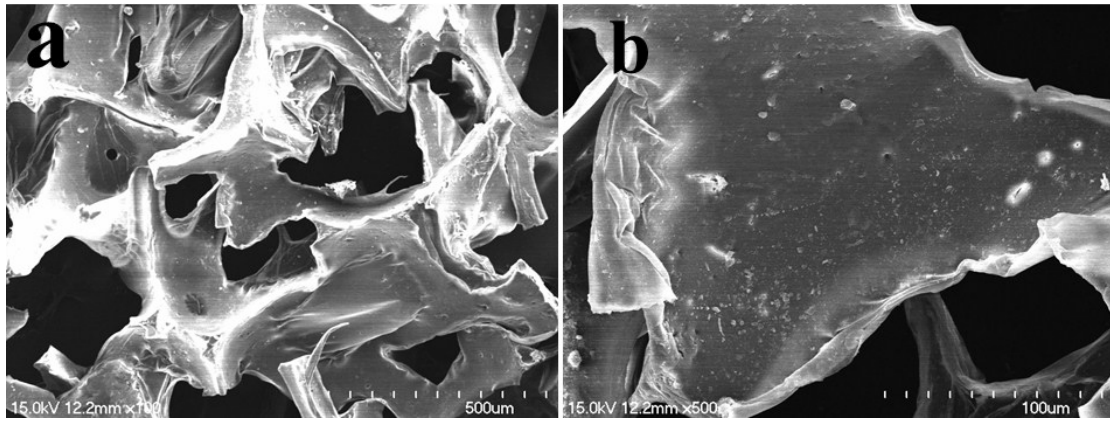

Fig. S1. The morphology of porous PU@rGO after 20 cycle's stress-strain tests, showing that the porous structure with interconnect pores (a) and rGO coated skeletons (b).

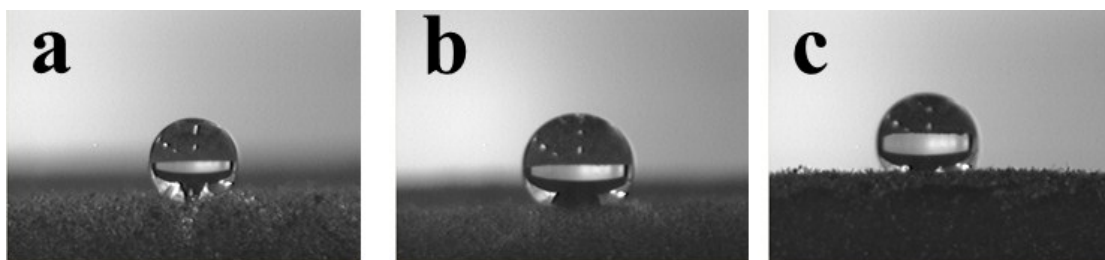

Fig. S2. The CA measurement of porous PU@rGO after immersion in acid solution (a), base solution (b) and hexane (c). The CA value was  $142.5^\circ$ ,  $138.0^\circ$  and  $130.5^\circ$ , respectively.

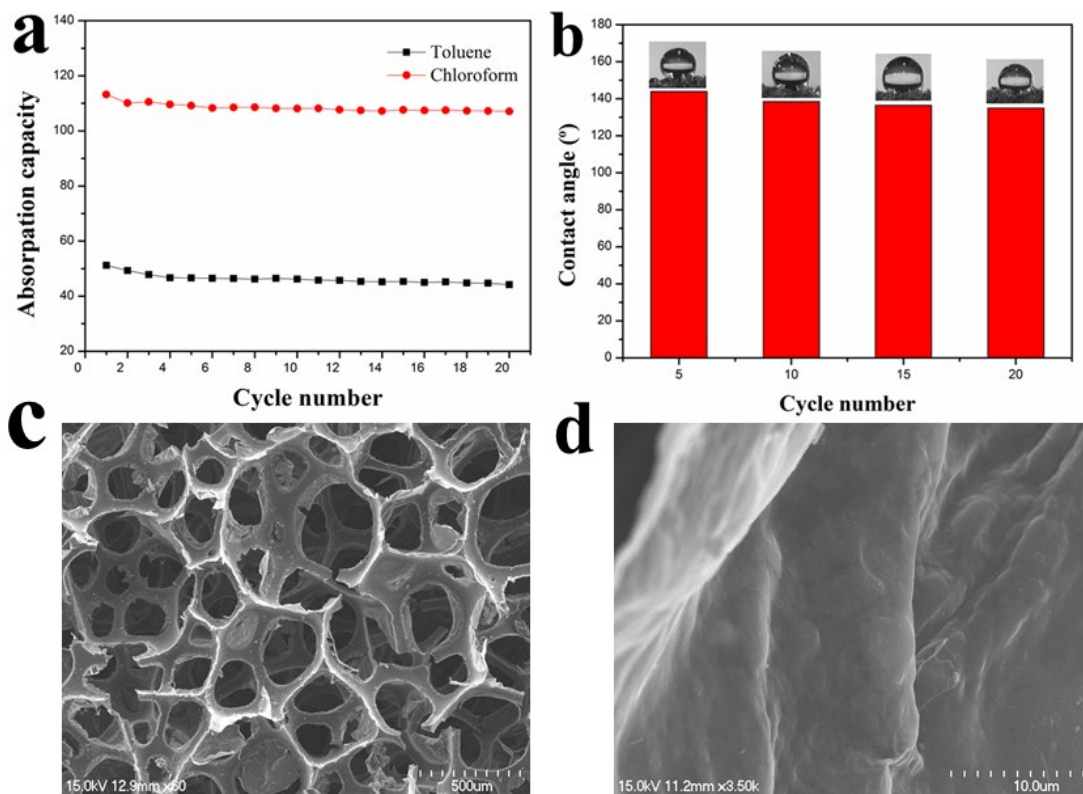

Fig. S3. (a) Absorption recyclability of porous PU@rGO for organic solvents. (b) Water contact angle recorded for porous PU@rGO after each five oil/water separation tests. (c and d) SEM images of PU@rGO material after reusability test, indicating that the rGO sheets were coated on the surface of PU structures.
